# Supplementary material for: No adverse effect of a maternal high carbohydrate diet on their offspring, in rainbow trout (Oncorhynchus mykiss)
Source: PeerJ. 2021 Sep 8;9:e12102. doi: 10.7717/peerj.12102 (PMC8434805; doi:10.7717/peerj.12102)
Supplement: Supplemental Information 1 [file peerj-09-12102-s001.xlsx]

## Sheet: Supplemental file 1
Dateinit	Datefinal	Tank	Condition	Ninit	Nfinal	Total BWinit	Total BWfinal	BWd	Feed consumed
0-3 weeks
2018-01-15	2018-02-01	Q2	HH	1439	1439	119.9	391.833	0	52.3
2018-01-15	2018-02-01	Q3	HH	1384	1384	115.3	376.8	0	59.2
2018-01-15	2018-02-01	Q4	HH	1561	1561	130.1	425.167	0	48.9
2018-01-15	2018-02-01	P7	HN	1454	1454	121.2	359.633	0	53.6
2018-01-15	2018-02-01	P8	HN	1434	1434	119.5	354.589	0	63.9
2018-01-15	2018-02-01	Q1	HN	1588	1588	132.3	392.57	0	61.8
2018-01-15	2018-02-01	P4	NH	1382	1382	115.2	375.223	0	47.8
2018-01-15	2018-02-01	P5	NH	1384	1384	115.3	375.549	0	62.6
2018-01-15	2018-02-01	P6	NH	1564	1564	130.3	424.406	0	63.7
2018-01-15	2018-02-01	P1	NN	1391	1391	115.9	355.868	0	50.6
2018-01-15	2018-02-01	P2	NN	1325	1325	110.4	338.981	0	60.3
2018-01-15	2018-02-01	P3	NN	1442	1442	120.2	369.071	0	58.8
3-18 weeks
2018-02-02	2018-05-18	J5	HH	150	144	40.85	3613	7.84719	2776.1
2018-02-02	2018-05-18	G1	HH	150	144	40.85	3382	11.2099	2682.7
2018-02-02	2018-05-18	G3	HH	150	148	40.85	3433	6.98613	2702.8
2018-02-02	2018-05-18	I5	HN	150	148	37.1572	3440	7.66477	2602.2
2018-02-02	2018-05-18	J3	HN	150	147	37.1572	3704	7.74424	2781.2
2018-02-02	2018-05-18	G5	HN	150	148	37.1572	3662	7.84207	2747
2018-02-02	2018-05-18	I3	NH	150	93	40.7709	2655	161.005	2213.6
2018-02-02	2018-05-18	H1	NH	150	144	40.7709	3615	16.2612	2771.9
2018-02-02	2018-05-18	H3	NH	150	144	40.7709	3447	8.97068	2718.4
2018-02-02	2018-05-18	J1	NN	150	143	38.3936	3536	17.2436	2709.9
2018-02-02	2018-05-18	H5	NN	150	146	38.3936	3647	16.8688	2755.7
2018-02-02	2018-05-18	I1	NN	150	146	38.3936	3636	7.33677	2736.1
18-21 weeks
2018-05-19	2018-06-08	G1	HH	100	100	2408	4540	0	2178
2018-05-19	2018-06-08	G3	HH	100	100	2377	4460	0	2077
2018-05-19	2018-06-08	J5	HH	100	100	2420	4580	0	2164
2018-05-19	2018-06-08	G5	HN	100	100	2447	4700	0	2076
2018-05-19	2018-06-08	I5	HN	100	100	2280	4280	0	1841
2018-05-19	2018-06-08	J3	HN	100	100	2406	4640	0	2117
2018-05-19	2018-06-08	H1	NH	100	70	2543	3540	0	1836
2018-05-19	2018-06-08	H3	NH	100	69	2429	3360	2785	1633
2018-05-19	2018-06-08	I3	NH	93	63	2655	3440	0	1756
2018-05-19	2018-06-08	H5	NN	100	100	2429	4660	0	2056
2018-05-19	2018-06-08	I1	NN	100	100	2426	4700	0	2165
2018-05-19	2018-06-08	J1	NN	100	100	2392	4460	0	2024
21-24 weeks
2018-06-08	2018-07-02	G1	HH	70	70	3220	5840	0	3033
2018-06-08	2018-07-02	G3	HH	70	70	3160	5680	0	2947
2018-06-08	2018-07-02	J5	HH	70	70	3280	5900	0	3004
2018-06-08	2018-07-02	G5	HN	70	70	3240	6040	0	2977
2018-06-08	2018-07-02	I5	HN	70	69	3060	5660	24	2744
2018-06-08	2018-07-02	J3	HN	70	70	3240	5740	0	2837
2018-06-08	2018-07-02	H1	NH	70	70	3540	6200	0	3179
2018-06-08	2018-07-02	H3	NH	69	69	3360	6020	0	3022
2018-06-08	2018-07-02	I3	NH	63	63	3440	5820	0	2973
2018-06-08	2018-07-02	H5	NN	70	70	3260	5600	0	2409
2018-06-08	2018-07-02	I1	NN	70	70	3260	5800	0	2964
2018-06-08	2018-07-02	J1	NN	70	70	3200	5520	0	2734
24-36 weeks
2018-07-03	2018-07-24	J5	HH	30	30	2680	4140	0	1707
2018-07-03	2018-07-24	G1	HH	30	30	2820	4380	0	1725
2018-07-03	2018-07-24	G3	HH	30	30	2500	3980	0	1608
2018-07-03	2018-07-24	I5	HN	30	30	2620	3940	0	1372
2018-07-03	2018-07-24	J3	HN	30	30	2600	3960	0	1507
2018-07-03	2018-07-24	G5	HN	30	30	2640	4000	0	1391
2018-07-03	2018-07-24	I3	NH	30	30	2980	4380	0	1713
2018-07-03	2018-07-24	H1	NH	30	29	2660	4140	102	1702
2018-07-03	2018-07-24	H3	NH	30	30	2760	4200	0	1594
2018-07-03	2018-07-24	J1	NN	30	30	2660	4020	0	1552
2018-07-03	2018-07-24	H5	NN	30	30	2640	3780	0	1229
2018-07-03	2018-07-24	I1	NN	30	30	2540	3920	0	1532
