# Supplementary material for: No adverse effect of a maternal high carbohydrate diet on their offspring, in rainbow trout (Oncorhynchus mykiss)
Source: PeerJ. 2021 Sep 8;9:e12102. doi: 10.7717/peerj.12102 (PMC8434805; doi:10.7717/peerj.12102)
Supplement: Supplemental Information 2 [file peerj-09-12102-s002.xlsx]

## Sheet: Feuil1
Model	npar	AIC	BIC	logKik	deviance	Chisq	Df	Pr(>Chisq)
Body weight (g)
Parameter ~ 1 + (1|tank)	3	383.20	387.78	-188.60	377.20
Parameter ~ maternal + (1|tank)	4	384.86	390.97	-188.43	376.86	0.3399	1	0.55989
Parameter ~ maternal + paternal + (1|tank)	5	383.35	390.98	-186.68	373.35	3.5113	1	0.06095
Parameter ~ maternal * paternal + (1|tank)	6	382.69	391.84	-185.34	370.69	2.6653	1	0.10256
Parameter ~ maternal * paternal + sex (1|tank)	7	384.57	395.26	-185.29	370.57	0.1140	1	0.73565
Parameter ~ maternal * paternal * sex (1|tank)	10	389.72	404.99	-184.86	369.72	0.8478	3	0.83801
Length (mm)
Parameter ~ 1 + (1|tank)	3	297.48	302.05	-145.74	291.48
Parameter ~ maternal + (1|tank)	4	299.29	305.40	-145.65	291.29	0.1830	1	0.66884
Parameter ~ maternal + paternal + (1|tank)	5	295.87	303.50	-142.93	285.87	5.4247	1	0.01985
Parameter ~ maternal * paternal + (1|tank)	6	296.80	305.96	-142.40	284.80	1.0657	1	0.30191
Parameter ~ maternal * paternal + sex (1|tank)	7	298.80	309.48	-142.40	284.80	0.0037	1	0.95168
Parameter ~ maternal * paternal * sex (1|tank)	10	304.34	319.61	-142.17	284.34	0.4539	3	0.92889
K
Parameter ~ 1 + (1|tank)	3	-30.895	-26.316	18.448	-36.895
Parameter ~ maternal + (1|tank)	4	-33.052	-26.946	20.526	-41.052	4.1563	1	0.04148
Parameter ~ maternal + paternal + (1|tank)	5	-32.857	-25.225	21.428	-42.857	1.8054	1	0.17906
Parameter ~ maternal * paternal + (1|tank)	6	-31.817	-22.658	21.908	-43.817	0.9596	1	0.32729
Parameter ~ maternal * paternal + sex (1|tank)	7	-30.475	-19.790	22.237	-44.475	0.6580	1	0.41728
Parameter ~ maternal * paternal * sex (1|tank)	10	-26.634	-11.370	23.317	-46.634	2.1593	3	0.54001
Glycemia (g.L-1)
Parameter ~ 1 + (1|tank)	3	-13.3722	-8.7931	9.6861	-19.372
Parameter ~ maternal + (1|tank)	4	-15.7622	-9.6568	11.8811	-23.762	4.3901	1	0.03615
Parameter ~ maternal + paternal + (1|tank)	5	-17.3009	-9.6691	13.6505	-27.301	3.5387	1	0.05995		.
Parameter ~ maternal * paternal + (1|tank)	6	-15.6649	-6.5067	13.8324	-27.665	0.3639	1	0.54632
Parameter ~ maternal * paternal + sex (1|tank)	7	-13.6700	-2.9855	13.8350	-27.670	0.0052	1	0.94275
Parameter ~ maternal * paternal * sex (1|tank)	10	-7.7071	7.5565	13.8535	-27.707	0.0370	3	0.99812
Cholesterolemia (g.L-1)
Parameter ~ 1 + (1|tank)	3	71.752	76.149	-32.876	65.752
Parameter ~ maternal + (1|tank)	4	70.196	76.059	-31.098	62.196	3.5567	1	0.059306
Parameter ~ maternal + paternal + (1|tank)	5	71.563	78.891	-30.781	61.563	0.6329	1	0.426291
Parameter ~ maternal * paternal + (1|tank)	6	73.489	82.283	-30.744	61.489	0.0739	1	0.785686
Parameter ~ maternal * paternal + sex (1|tank)	7	68.732	78.992	-27.366	54.732	6.7569	1	0.009339
Parameter ~ maternal * paternal * sex (1|tank)	10	73.082	87.739	-26.541	53.082	1.6497	3	0.648173
FFA (mmol.L-1)
Parameter ~ 1 + (1|tank)	3	-64.481	-59.902	35.241	-70.481
Parameter ~ maternal + (1|tank)	4	-64.832	-58.727	36.416	-72.832	2.3509	1	0.125213
Parameter ~ maternal + paternal + (1|tank)	5	-63.010	-55.378	36.505	-73.010	0.1778	1	0.673269
Parameter ~ maternal * paternal + (1|tank)	6	-68.241	-59.082	40.120	-80.241	7.2308	1	0.007166
Parameter ~ maternal * paternal + sex (1|tank)	7	-75.856	-65.172	44.928	-89.856	9.6158	1	0.001929
Parameter ~ maternal * paternal * sex (1|tank)	10	-73.491	-58.227	46.745	-93.491	3.6342	3	0.303766
Triglycerides (g.L-1)
Parameter ~ 1 + (1|tank)	3	148.36	152.85	-71.181	142.36
Parameter ~ maternal + (1|tank)	4	149.79	155.78	-70.895	141.79	0.5710	1	0.44985
Parameter ~ maternal + paternal + (1|tank)	5	151.61	159.09	-70.803	141.61	0.1837	1	0.66820
Parameter ~ maternal * paternal + (1|tank)	6	152.81	161.79	-70.408	140.81	0.7916	1	0.37363
Parameter ~ maternal * paternal + sex (1|tank)	7	148.61	159.08	-67.303	134.61	6.2091	1	0.01271
Parameter ~ maternal * paternal * sex (1|tank)	10	144.24	159.21	-62.120	124.24	10.3666	3	0.01569
HSI (%)
Parameter ~ 1 + (1|tank)	3	-233.70	-229.12	119.85	-239.70
Parameter ~ maternal + (1|tank)	4	-234.09	-227.98	121.05	-242.09	2.3918	1	0.1220
Parameter ~ maternal + paternal + (1|tank)	5	-232.16	-224.53	121.08	-242.16	0.0677	1	0.7947
Parameter ~ maternal * paternal + (1|tank)	6	-230.22	-221.06	121.11	-242.22	0.0650	1	0.7988
Parameter ~ maternal * paternal + sex (1|tank)	7	-228.24	-217.55	121.12	-242.24	0.0128	1	0.9100
Parameter ~ maternal * paternal * sex (1|tank)	10	-224.74	-209.47	122.37	-244.74	2.5007	3	0.4752
Hepatic protein content (%DM)
Parameter ~ 1 + (1|tank)	3	-172.78	-168.20	89.390	-178.78
Parameter ~ maternal + (1|tank)	4	-171.70	-165.59	89.849	-179.70	0.9182	1	0.33795
Parameter ~ maternal + paternal + (1|tank)	5	-173.74	-166.11	91.869	-183.74	4.0393	1	0.04445
Parameter ~ maternal * paternal + (1|tank)	6	-171.76	-162.60	91.878	-183.76	0.0191	1	0.89006
Parameter ~ maternal * paternal + sex (1|tank)	7	-170.66	-159.98	92.331	-184.66	0.9042	1	0.34165
Parameter ~ maternal * paternal * sex (1|tank)	10	-171.40	-156.14	95.701	-191.40	6.7401	3	0.08066
Hepatic lipid content (%DM)
Parameter ~ 1 + (1|tank)	3	-130.83	-126.25	68.415	-136.83
Parameter ~ maternal + (1|tank)	4	-130.25	-124.14	69.123	-138.25	1.4153	1	0.234179
Parameter ~ maternal + paternal + (1|tank)	5	-128.41	-120.78	69.203	-138.41	0.1614	1	0.687895
Parameter ~ maternal * paternal + (1|tank)	6	-129.77	-120.61	70.886	-141.77	3.3654	1	0.066578		.
Parameter ~ maternal * paternal + sex (1|tank)	7	-128.29	-117.60	71.143	-142.29	0.5141	1	0.473348
Parameter ~ maternal * paternal * sex (1|tank)	10	-135.93	-120.67	77.964	-155.93	13.6424	3	0.003435
Hepatic free glucose content (mg.g-1)
Parameter ~ 1 + (1|tank)	3	236.99	241.57	-115.49	230.99
Parameter ~ maternal + (1|tank)	4	233.86	239.96	-112.93	225.86	5.1310	1	0.02350
Parameter ~ maternal + paternal + (1|tank)	5	235.85	243.48	-112.93	225.85	0.0050	1	0.94348
Parameter ~ maternal * paternal + (1|tank)	6	234.92	244.08	-111.46	222.92	2.9319	1	0.08684
Parameter ~ maternal * paternal + sex (1|tank)	7	236.49	247.17	-111.24	222.49	0.4312	1	0.51140
Parameter ~ maternal * paternal * sex (1|tank)	10	238.66	253.93	-109.33	218.66	3.8261	3	0.28087
Hepatic glycogen content (mg.g-1)
Parameter ~ 1 + (1|tank)	3	426.52	431.10	-210.26	420.52
Parameter ~ maternal + (1|tank)	4	426.69	432.80	-209.35	418.69	1.8267	1	0.17651
Parameter ~ maternal + paternal + (1|tank)	5	423.24	430.87	-206.62	413.24	5.4583	1	0.01948
Parameter ~ maternal * paternal + (1|tank)	6	424.86	434.02	-206.43	412.86	0.3727	1	0.54153
Parameter ~ maternal * paternal + sex (1|tank)	7	426.24	436.92	-206.12	412.24	0.6223	1	0.43018
Parameter ~ maternal * paternal * sex (1|tank)	10	427.51	442.77	-203.75	407.51	4.7341	3	0.19234
VSI (%)
Parameter ~ 1 + (1|tank)	3	-136.76	-132.18	71.381	-142.76
Parameter ~ maternal + (1|tank)	4	-137.01	-130.90	72.505	-145.01	2.2475	1	0.13383
Parameter ~ maternal + paternal + (1|tank)	5	-135.41	-127.78	72.707	-145.41	0.4043	1	0.52489
Parameter ~ maternal * paternal + (1|tank)	6	-133.68	-124.52	72.839	-145.68	0.2641	1	0.60733
Parameter ~ maternal * paternal + sex (1|tank)	7	-135.27	-124.59	74.637	-149.27	3.5971	1	0.05788
Parameter ~ maternal * paternal * sex (1|tank)	10	-139.85	-124.59	79.926	-159.85	10.5771	3	0.01425
Viscera protein content (%DM)
Parameter ~ 1 + (1|tank)	3	-131.87	-127.29	68.937	-137.87
Parameter ~ maternal + (1|tank)	4	-131.66	-125.56	69.833	-139.66	1.7920	1	0.1807
Parameter ~ maternal + paternal + (1|tank)	5	-130.02	-122.39	70.009	-140.02	0.3523	1	0.5528
Parameter ~ maternal * paternal + (1|tank)	6	-128.07	-118.91	70.036	-140.07	0.0537	1	0.8168
Parameter ~ maternal * paternal + sex (1|tank)	7	-131.70	-121.01	72.849	-145.70	5.6257	1	0.0177
Parameter ~ maternal * paternal * sex (1|tank)	10	-128.98	-113.72	74.492	-148.98	3.2866	3	0.3495
Viscera lipid content (%DM)
Parameter ~ 1 + (1|tank)	3	-78.007	-73.428	42.004	-84.007
Parameter ~ maternal + (1|tank)	4	-76.505	-70.400	42.253	-84.505	0.4976	1	0.480546
Parameter ~ maternal + paternal + (1|tank)	5	-82.908	-75.277	46.454	-92.908	8.4034	1	0.003745
Parameter ~ maternal * paternal + (1|tank)	6	-81.684	-72.526	46.842	-93.684	0.7760	1	0.378368
Parameter ~ maternal * paternal + sex (1|tank)	7	-82.356	-71.671	48.178	-96.356	2.6712	1	0.102179
Parameter ~ maternal * paternal * sex (1|tank)	10	-83.556	-68.292	51.778	-103.556	7.2004	3	0.065776
Muscle protein content (%DM)
Parameter ~ 1 + (1|tank)	3	-223.47	-218.89	114.73	-229.47
Parameter ~ maternal + (1|tank)	4	-222.28	-216.17	115.14	-230.28	0.8147	1	0.36674
Parameter ~ maternal + paternal + (1|tank)	5	-222.02	-214.39	116.01	-232.02	1.7450	1	0.18651
Parameter ~ maternal * paternal + (1|tank)	6	-220.18	-211.02	116.09	-232.18	0.1525	1	0.69614
Parameter ~ maternal * paternal + sex (1|tank)	7	-219.28	-208.60	116.64	-233.28	1.1045	1	0.29328
Parameter ~ maternal * paternal * sex (1|tank)	10	-220.72	-205.45	120.36	-240.72	7.4341	3	0.05928 .
Muscle lipid content (%DM)
Parameter ~ 1 + (1|tank)	3	-154.45	-149.87	80.224	-160.45
Parameter ~ maternal + (1|tank)	4	-153.06	-146.96	80.530	-161.06	0.6133	1	0.433566
Parameter ~ maternal + paternal + (1|tank)	5	-151.29	-143.65	80.643	-161.29	0.2253	1	0.635002
Parameter ~ maternal * paternal + (1|tank)	6	-149.32	-140.16	80.660	-161.32	0.0349	1	0.851788
Parameter ~ maternal * paternal + sex (1|tank)	7	-151.37	-140.68	82.684	-165.37	4.0471	1	0.044247
Parameter ~ maternal * paternal * sex (1|tank)	10	-159.71	-144.44	89.853	-179.71	14.3380	3	0.002479
